1 **Correction for both common and rare cell types in blood is important to identify genes that**  
2 **correlate with age**

3

4 Damiano Pellegrino Coppola<sup>1\*</sup>, Annique Claringbould<sup>1\*</sup>, Maartje Stutvoet<sup>1</sup>, BIOS Consortium, Dorret  
5 I. Boomsma<sup>2</sup>, M. Arfan Ikram<sup>3</sup>, Eline Slagboom<sup>4</sup>, Harm-Jan Westra<sup>1</sup>, Lude Franke<sup>1</sup>

6

7 *1. Department of Genetics, University Medical Centre Groningen, Groningen, the Netherlands*

8 *2. Netherlands Twin Register, Department of Biological Psychology, Vrije Universiteit Amsterdam,*  
9 *Amsterdam Public Health research institute and Amsterdam Neuroscience, the Netherlands*

10 *3. Department of Epidemiology, Erasmus University Medical Centre, Rotterdam, the Netherlands*

11 *4. Department of Biomedical Data Sciences, Leiden University Medical Center, Leiden, the Netherlands*

12 \*equal contribution

13

14 Corresponding author: Lude Franke, [ludefranke@gmail.com](mailto:ludefranke@gmail.com)

15

16 **Abstract**

17 *Background*

18 Aging is a multifactorial process that affects multiple tissues and is characterized by changes in  
19 homeostasis over time, leading to increased morbidity. Whole blood gene expression signatures have  
20 been associated with aging and have been used to gain information on its biological mechanisms, which  
21 are still not fully understood. However, blood is composed of many cell types whose proportions in  
22 blood vary with age. As a result, previously observed associations between gene expression levels and  
23 aging might be driven by cell type composition rather than intracellular aging mechanisms. To  
24 overcome this, previous aging studies already accounted for major cell types, but the possibility that the  
25 reported associations are false positives driven by less prevalent cell subtypes remains.

26 *Results*

27 Here, we compared the regression model from our previous work to an extended model that corrects  
28 for 33 additional white blood cell subtypes. Both models were applied to whole blood gene expression

29 data from 3165 individuals belonging to the general population (age range of 18-81 years). We  
30 evaluated that the new model is a better fit for the data and it identified fewer genes associated with  
31 aging (625, compared to the 2808 of the initial model;  $P \leq 2.5 \times 10^{-6}$ ). Moreover, 511 genes (~18% of  
32 the 2,808 genes identified by the initial model) were found using both models, indicating that the other  
33 previously reported genes could be proxies for less abundant cell types. In particular, functional  
34 enrichment of the genes identified by the new model highlighted pathways and GO terms specifically  
35 associated with platelet activity.

### 36 *Conclusions*

37 We conclude that gene expression analyses in blood strongly benefit from correction for both common  
38 and rare blood cell types, and recommend using blood-cell count estimates as standard covariates when  
39 studying whole blood gene expression.

40

41 Keywords: whole blood, gene expression, cell counts correction, aging, platelet activity

42

### 43 **Background**

44 Aging, defined as a time-dependent process characterized by physical and cognitive decline, is one of  
45 the main risk factors for autoimmune diseases, neurodegenerative diseases, cancer and diabetes [1,2].  
46 To better understand this process on a molecular level, changes in gene expression during aging have  
47 been previously studied in whole blood [3,4]. However, blood contains many cell populations, such as  
48 white blood cells (WBC) that can be divided into granulocytes, lymphocytes and monocytes, and further  
49 into more specific WBC subtypes [5]. Since the proportions of these cell populations vary with age [6–  
50 9], it is necessary to correct for cell counts when using gene expression from blood. Indeed, uncorrected  
51 gene expression data from whole blood has been shown before to be biased by the gene expression  
52 pattern of the most abundant cell type at the moment of sampling [10].

53

54 Here, to better identify cell-independent transcriptional signatures during aging, we expanded the  
55 regression model that corrects for the number of WBC presented in our previous work [3] (hereafter  
56 called Initial Model, IM), by taking into account additional specific WBC subtype counts in our new

57 model (hereafter called Extended Model, EM). We compared the performance of these two models in  
58 a meta-analysis using 3165 human peripheral blood-derived RNA-seq samples from four independent  
59 Dutch cohorts present in the BIOS consortium, namely LifeLines Deep, Leiden Longevity Study,  
60 Netherlands Twin Registry and Rotterdam Study [11–14]. Further, we show that the EM complies with  
61 the assumptions of linear regression and provides a better fit to the data as residuals decrease. Lastly,  
62 we analyze the genes significantly up- and downregulated by functional enrichment in order to  
63 understand to which extent the models and cell correction can be used to extract biological information  
64 regarding aging in a general population.

65

## 66 Results

### 67 *Improved cell correction is necessary to identify cell-independent gene expression patterns*

68 We performed an association of gene expression changes with age using data from four Dutch cohorts  
69 (Tab. S1). To take into account the differences in the data, we conducted a meta-analysis across these  
70 cohorts. We included only samples with all categorical covariates reported, leaving a total of 3165  
71 individuals (Tab. S1). An overview of this study is presented in Fig. 1.

72

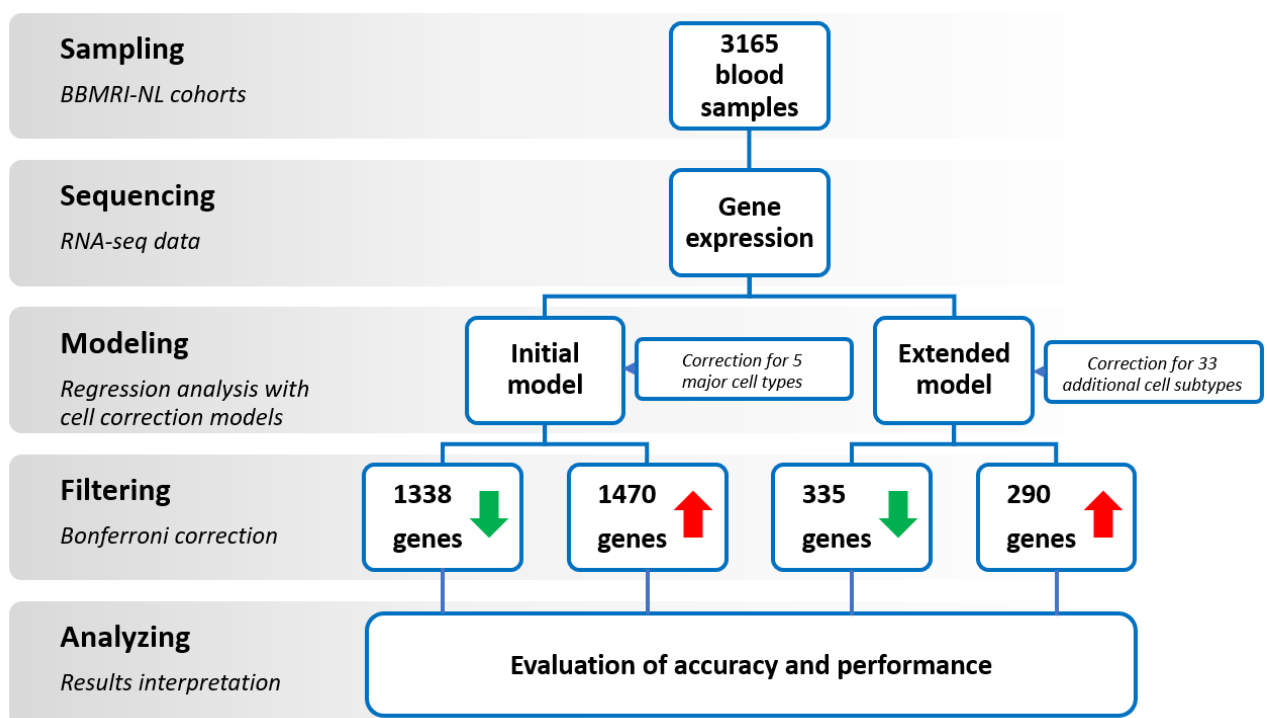

73

74 **Fig. 1. Overview of this study.** 3165 complete samples from four BBMRI-NL BIOS consortium  
75 cohorts were used (see text for details). Gene expression was related to age and selected covariates  
76 depending on the regression model applied (Initial or Extended). Genes significantly associated with  
77 age were retrieved by applying Bonferroni correction ( $P \leq 2.5 \times 10^{-6}$ ) and gene lists obtained were  
78 compared to establish the efficiency of the models and analyzed to get insights on the process of aging.  
79  
80 We tested 19932 genes expressed in blood and analyzed the data by applying two models, the IM and  
81 the EM (see *Methods* and Fig. 1). The IM was presented previously [3]: it accounts for the main WBC  
82 types (number of granulocytes, lymphocytes, monocytes), erythrocytes and platelets, while our new  
83 model here presented, EM, corrects for 33 additional WBC subtypes (see *Methods*, Tab. S2 and S3).  
84 These additional WBC subtypes were imputed with Decon-cell [15]. We observed small but significant  
85 correlations between age and most measured and imputed cell counts (Fig. S1), presenting evidence  
86 that adding WBC subtypes is beneficial for the correction models. For example, different imputed cell  
87 types, such as naïve CD8<sup>+</sup> subtypes (IT50 and IT54 [16]), show a strong negative correlation with age  
88 when considering both the overall (Fig. S1) and the single cohorts (data not shown).  
89  
90 Using the IM, we identified 1338 genes significantly downregulated and 1470 upregulated with age  
91 after Bonferroni correction ( $P \leq 2.5 \times 10^{-6}$ ) (Tab. S4 and Fig. 1). The EM, however, reduced the number  
92 of results substantially: we identified 335 downregulated and 290 upregulated genes significantly  
93 associated with aging at the same significance threshold (Tab. S4 and Fig. 1). This decrease was  
94 expected, as many of the results from the IM may have been driven by the composition of less prominent  
95 cell types that were included in our EM model. While 511 out of 625 EM genes were also present in  
96 the IM results, the 114 additional EM genes were only detected after rigorous correction for cell types  
97 (Fig. S2). To validate our results, we compared the number of genes retrieved through our models with  
98 the 1497 genes reported in our previous work [3] (gene set 1, GS1) and the 481 genes identified by Lin  
99 and colleagues [4] (gene set 2, GS2), a study that uses a slightly different correction model to study  
100 aging. As reported in Tab. S5, the highest number of overlapping genes was found between the IM and  
101 the GS1 (672, 24% of our 2808 IM genes). Considering that the number of tested genes is different

102 (11908 for GS1 and 19932 for IM, 10890 in common), this overlap is quite large. Moreover, all genes  
103 had the same direction of association with age. These results are unsurprising, because we used the  
104 same previous correction model [3]. When comparing the EM results with the GS1, the number of  
105 overlapping genes decreased (172, 28% of our EM genes) but the majority still had the same direction  
106 (98%). The lowest number of overlapping genes was found between the EM results and the GS2 (9  
107 genes overlapping, 7 with the same direction). In general, differences in the number of overlapping  
108 genes may result from: 1) differences in the model used, 2) differences in the technical analyses  
109 performed [17] and 3) differences between the genes used in the discovery phase. Overall, the models  
110 show a good conservation of direction for overlapping genes, which indicates that correcting for cell  
111 populations identifies common whole blood gene expression patterns.

112

### 113 *The Extended Model performs better than the Initial Model*

114 We next investigated whether both IM and EM met assumptions of linear regression. To this end, we  
115 analyzed the mean squared errors (MSE), the distribution of gene expression residuals and their  
116 homoscedasticity after applying the IM and EM. We first analyzed the impact of adding additional  
117 terms to our regression models on the MSE. As expected, MSE values of the regressions for every gene  
118 decreased when applying the EM (total EM median MSE value: 0.267, total IM median MSE value:  
119 0.334) (Fig. 2A-B and Tab. S6). We next created QQ-plots and calculated the Pearson correlation  
120 coefficient between the observed and expected distributions to assess normality. For most genes,  
121 including the 511 shared between IM and EM, we found that applying the EM resulted in more normally  
122 distributed residual values and the correlation values were higher (total EM median  $r$  value: 0.995, total  
123 IM median  $r$  value: 0.994) (Fig. 2C-D, Tab. S6 and S7). Lastly, we wanted to evaluate heteroskedasticity  
124 (i.e. the skewness on the distribution of residuals), as this can indicate a relation between the error and  
125 the explained variable, violating the model assumptions. For this purpose, we created a modified version  
126 of both models that included all covariates with the exception of age and applied the four resulting  
127 models (IM, EM, IM-age, EM-age) in each cohort. Then, we used the rank-based Spearman correlations  
128 to correlate gene expression residuals with age [18,19]. We checked the normality of these Spearman  $\rho$   
129 values and meta-analyzed them across the cohorts (Fig. S3). We observed that the absolute correlations

130 were smallest in the EM model (EM median value:  $9 \times 10^{-3}$ ), and largest in the IM without age (IM-age  
131 median value:  $6 \times 10^{-2}$ ) (Fig. 2E-F, Tab. S6 and S7). Large  $\rho$  values indicate a less precise prediction  
132 and larger errors. In general, the EM performs better than the IM, and it is specifically noteworthy that  
133 the EM without age performs better than the IM without age. Adding cell counts clearly improves the  
134 prediction of gene expression values. These three analyses indicate that the EM satisfies the assumptions  
135 of linear regression better than IM. Moreover, adding cell counts as covariates improves reliable  
136 identification of aging-related genes in whole blood.

## Analyses of Gene Expression Residuals

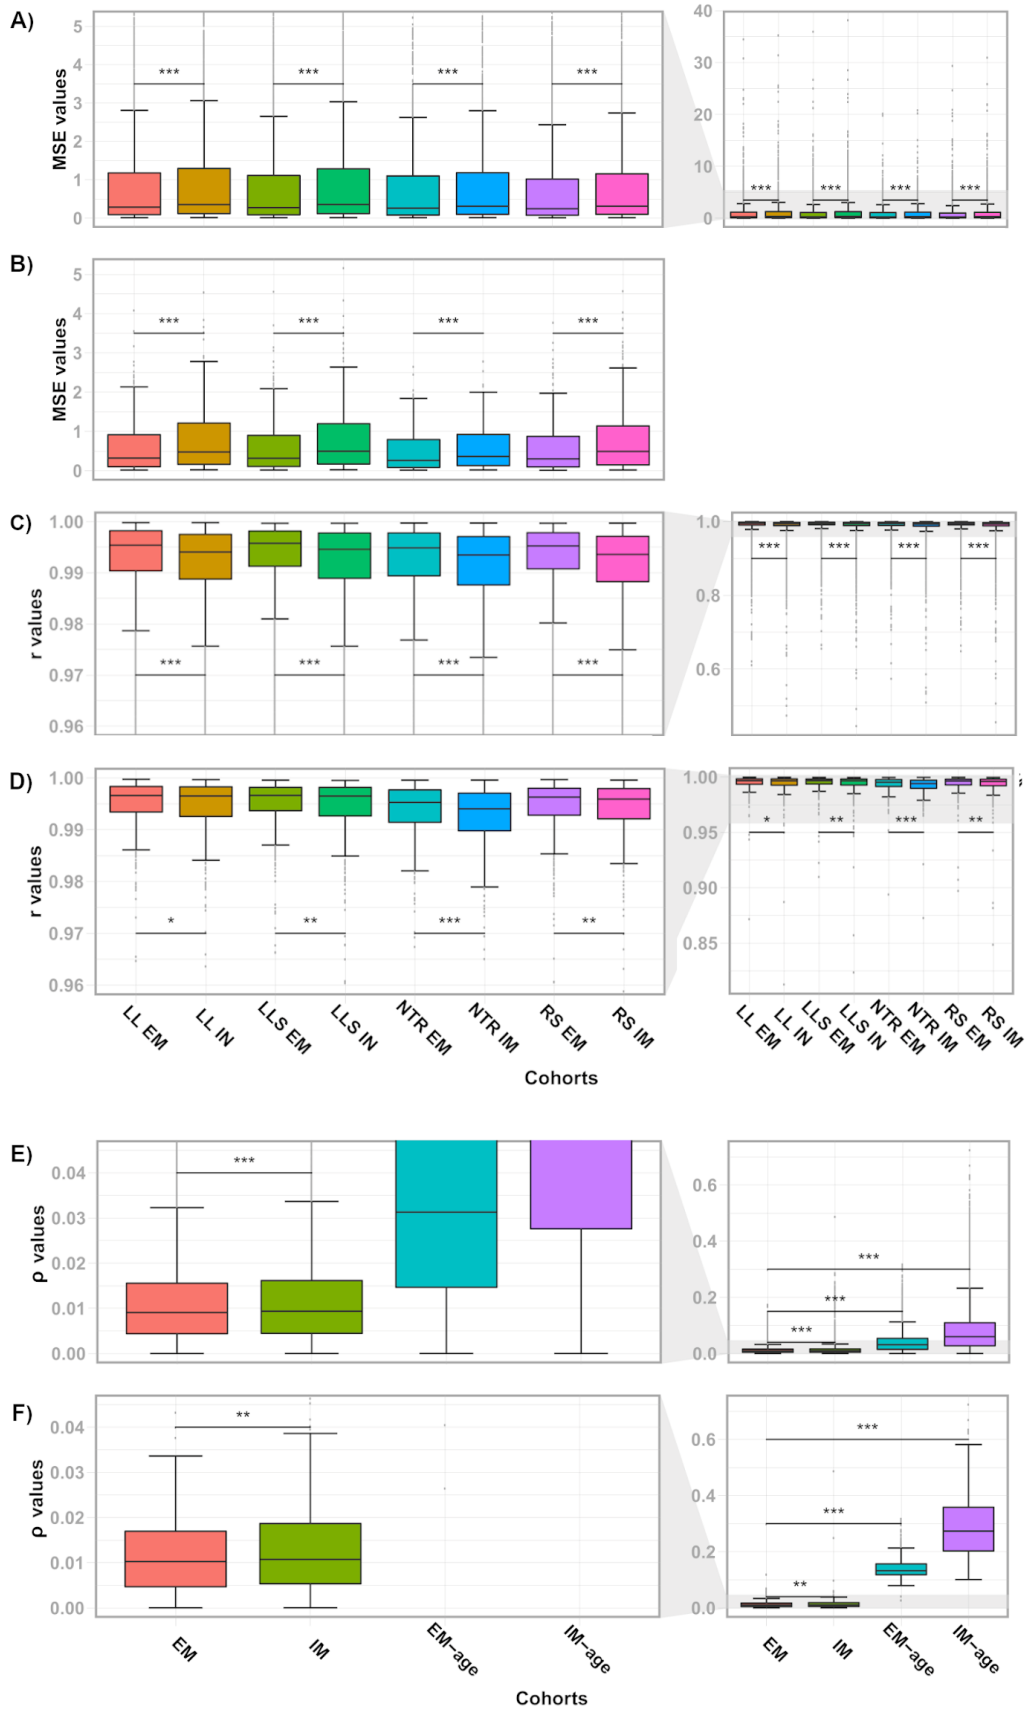

138 **Fig. 2. Gene expression residuals decrease with the EM.** MSE values for regressions related to genes  
139 in every cohort after applying the IM and the EM are reported for all genes in (A), and the 511 shared  
140 genes in (B). QQ plot Pearson correlation coefficients ( $r$  values) related to the distributions of gene  
141 expression residuals are shown for all genes in (C) and for the shared genes significantly associated to  
142 aging in (D), after applying the IM and EM models. Homoscedasticity was evaluated by correlating  
143 gene expression residuals from every model with age, and the absolute Spearman  $\rho$  values obtained  
144 after meta-analysis are reported for all genes (E) and the shared genes significantly associated with  
145 aging (F). LL, LifeLines DEEP; LLS, Leiden Longevity Study; NTR, Netherlands Twin Registry; RS,  
146 Rotterdam Study; EM, extended model; IM, initial model; EM-age, extended model without age as  
147 covariate; IM-age, initial model without age as covariate. Statistical significance was assessed with a  
148 paired, one-tailed Wilcoxon test. The stars indicate statistical significance: \*\*\*  $P \leq 0.001$ , \*\*  $P \leq 0.01$ ,  
149 \*  $P \leq 0.05$ .

150

### 151 *Single-cell RNA-seq data reveals the contribution of cell types to gene expression during aging*

152 Every cell type has its own gene expression pattern, so the composition of blood cells influences the  
153 total gene expression observed in whole blood RNA-seq data. To test to which extent the aging-related  
154 genes found by the models were influenced by blood cell populations, we investigated the mean  
155 expression of these aging-related genes in single-cell RNA-seq (scRNA-seq) data of 11 different blood  
156 cell types [20]. As shown in the t-SNE plots (Fig. 3A), aging-related genes retrieved through the IM  
157 have a propensity to be expressed in specific parts of the t-SNE plot that match with cell types, while  
158 EM genes maintain a lower and more stable expression across cell types (Wilcoxon test,  $P \leq 2.2 \times 10^{-16}$ ,  
159 Fig. 3B on the left), suggesting that it is not a specific cell type driving the associations. Secondly, we  
160 used differential expression patterns to identify blood cell type specific markers in the list of IM or EM  
161 significant aging-related genes, and visualized the mean expression in t-SNE plots (Fig. S4). The EM  
162 aging-related genes contain fewer cell type specific markers: no markers could be identified for three  
163 cell types (Natural Killer bright subset, CD8<sup>+</sup> T and B cells). Importantly, the cell type marker genes  
164 that were identified among EM genes are less representative for their cell types than the IM markers, as  
165 shown in Fig. S4. In addition, we observed that the mean expression range for the EM genes was always



166 larger, highlighting a higher gene expression variation (mean expression of IM genes per cell: 0.05 -  
167 0.21; EM: 0.02 - 0.28, Fig. 3A and S4). This observation was supported by the scRNA-seq coefficients  
168 of variation calculated for the EM genes (Wilcoxon test,  $P = 3.794 \times 10^{-10}$ , Fig. 3B on the right). In  
169 summary, the scRNA-seq data indicate that EM genes are less driven by cell types than the IM genes,  
170 suggesting that the EM model enables a better identification in blood of cell-quantity independent genes  
171 related to aging.  
172

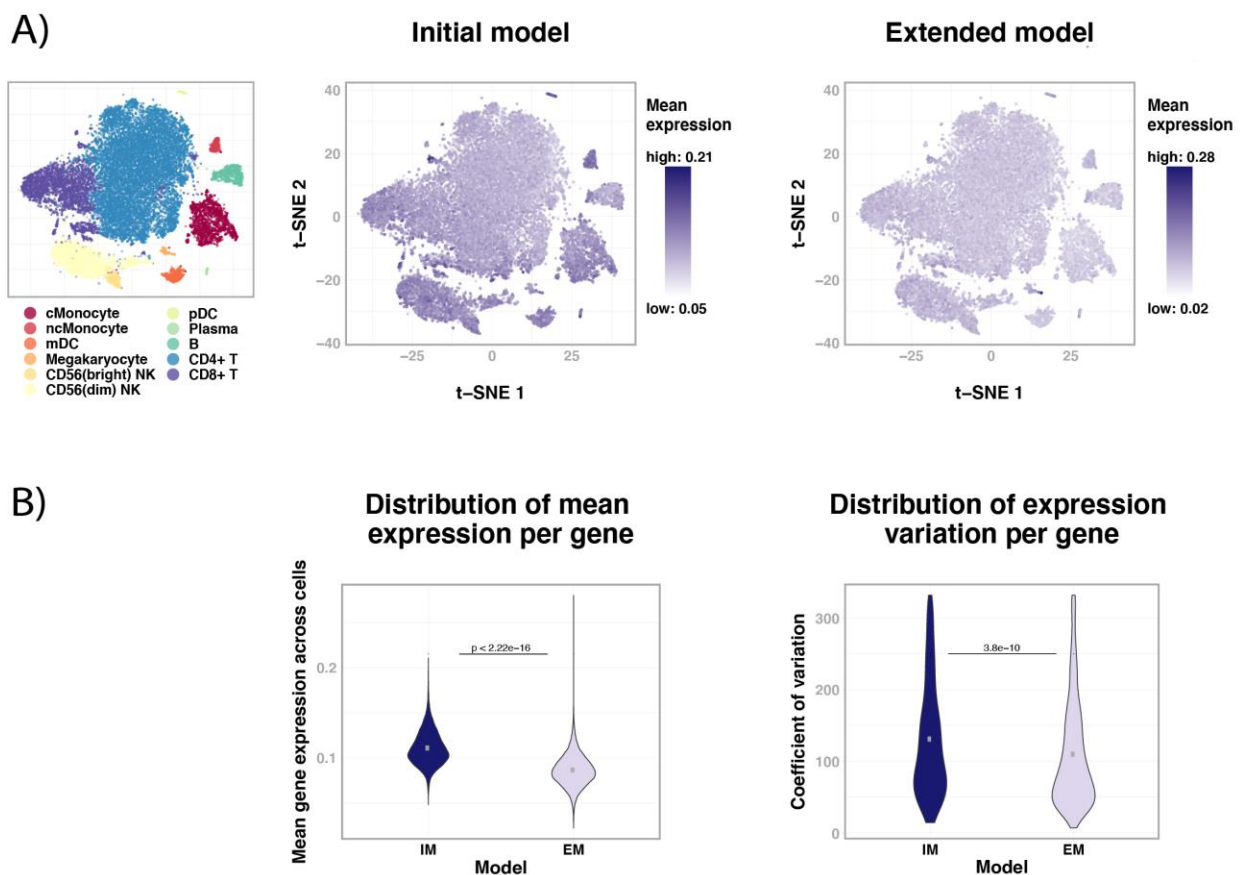

173  
174 **Fig. 3. scRNA-seq data reveals that the aging-related genes found with the EM are not related to**  
175 **specific blood cell populations.** The mean expression value of aging-related genes is plotted in relation  
176 to blood cell populations in A): the upper t-SNE plots refer to the IM, on the left, and the EM, on the  
177 right. In B), the distributions of the means for gene expression for every cell in the above t-SNE plots  
178 according to the IM and EM are reported on the left, while on the right the distributions of the coefficient  
179 of variation are presented for both the IM and EM. Statistical significance was assessed with a Wilcoxon

180 test. The level of statistical significance was set at  $P \leq 0.05$ . For details regarding cell population-  
181 specific regions, refer to [20].

182

### 183 *Functional enrichment analysis and aging signatures*

184 In order to investigate whether the EM-derived aging-related genes were more informative than the IM-  
185 derived genes, we performed functional enrichment using Enrichr [21]. As 82% of the EM genes were  
186 also present in the IM list, we expected comparable functional enrichments. On the contrary, very few  
187 pathways and GO terms were shared between the EM and IM lists (Tab. S8). The fact that we observed  
188 a smaller number of genes in the EM list did not translate to a lower number of EM-specific  
189 enrichments. Therefore, we hypothesized that although a high number of genes is shared between the  
190 EM and the IM, the difference in the functional enrichment results was due to the exclusion of genes  
191 that are influenced by cell quantity, for which the IM did not correct. Indeed, the enrichments for the  
192 EM genes clustered around potential aging-related mechanisms. For example, changes in GO biological  
193 processes ascribable to the regulation of gene expression were downregulated (e.g. ‘regulation of  
194 transcription, DNA-templated’ - GO:0006355, ‘regulation of nucleic acid-templated transcription’ -  
195 GO:1903506, ‘regulation of protein processing’ - GO:0070613), in agreement with previous findings  
196 [3] and the IM results.

197

198 Hemostasis, the process to prevent and stop bleeding, emerged as a key upregulated pathway from the  
199 various EM-related enrichment analyses (Tab. S8). The Kegg pathway ‘coagulation cascade’ and the  
200 Reactome pathway ‘hemostasis’ were both significantly upregulated ( $P \leq 6.2 \times 10^{-4}$ ,  $P \leq 4.5 \times 10^{-6}$ ,  
201 respectively), suggesting that changes in the expression of genes related to hemostasis and platelet  
202 functioning during aging have a very robust signature, as previously reported [22–26]. Changes in GO  
203 biological process terms related to platelet activity (GO:0045055, GO:0002576, Tab. S8) and GO  
204 cellular compartment terms linked to platelet granules (e.g. ‘platelet alpha granule’ - GO:0031091, Tab.  
205 S8) were also found to be significant. Notably, both models included the correction for platelet counts,  
206 suggesting that these functional enrichments described the activity of platelets independently of their

207 prevalence. Platelet count remained more or less stable during aging in our data (Fig. S1), so the number  
208 of platelets is not expected to drive these enrichments.  
209

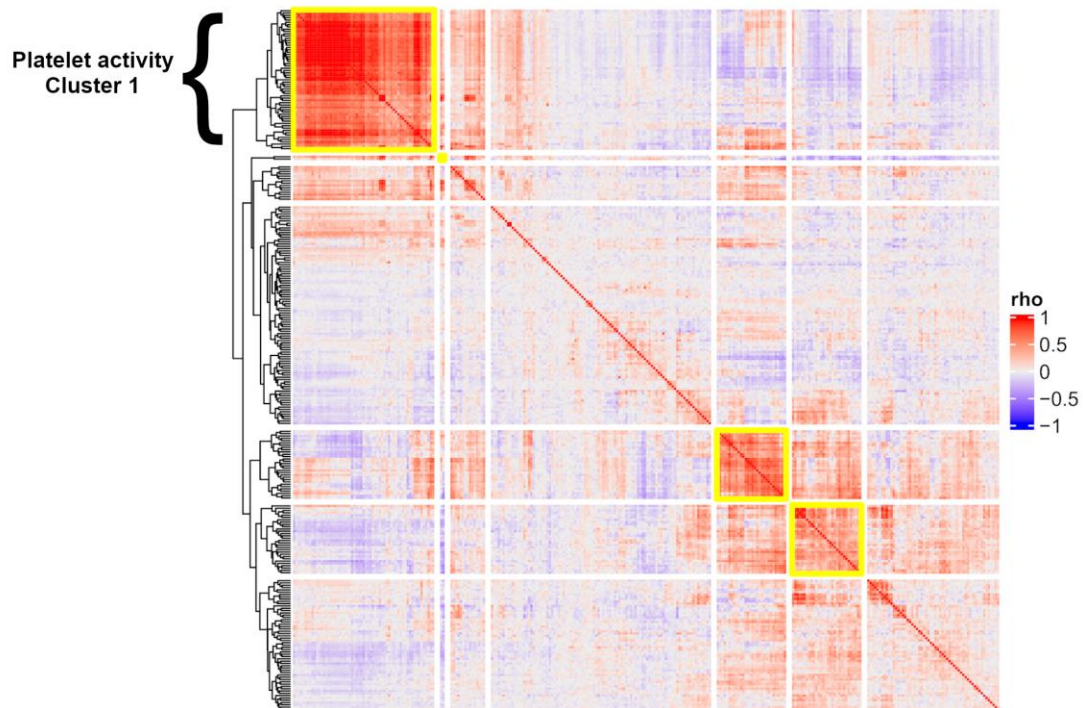

210  
211 **Fig. 4. Heatmap of gene expression residuals correlations for EM upregulated aging-related**  
212 **genes.** Upregulated EM aging-related genes were clustered based on the correlations of gene expression  
213 residuals and highly correlating clusters were identified and highlighted with a yellow border. The  
214 cluster in the upper left corner contains genes associated with platelet activity pathway and GO terms.  
215

216 After applying the EM, we expected that genes involved in the same biological process and under the  
217 same regulation could show a common pattern. To identify this pattern, we calculated the correlations  
218 between the gene expression residuals. We observed several clusters with highly correlating values (Fig.  
219 4 and Fig. S5), which we further analyzed with Enrichr. While most clusters did not show a clear  
220 enrichment, cluster 1 of the upregulated EM aging-related genes (Fig. 4, upper left corner) was enriched  
221 for terms related to platelet activity, again highlighting its role in aging. Five genes (*PF4*, *PPBP*,  
222 *STON2*, *MYLK*, *LMNA*) from the platelet-related cluster 1 were previously identified to be differentially

223 expressed with age in platelets [25]. Although *PF4* and *PPBP* did not show the same direction of effect,  
224 a difference that may result from the sample size or the model used, the overall finding that platelets  
225 show increased activity with age is conserved [22,23,25,26].

226

## 227 **Discussion**

228 Aging is a process that enhances the probability of getting diseases such as cancer, diabetes and various  
229 types of neurodegenerations. In order to understand how an organism reaches these diseased states, it  
230 is valuable to study the preceding period, where the organism ages. Changes can be investigated by  
231 analyzing aging cohorts as representatives of an aging population. Following this reasoning, in this  
232 study we used four Dutch aging cohorts (Tab. S1) and analyzed gene expression changes during aging  
233 in whole blood, an easily accessible tissue, by implementing a new model (EM) to correct for cell type  
234 proportions. This extended cell correction enabled us to calibrate gene expression according to the  
235 number of blood cells and extract an aging gene expression pattern that was less influenced by cell  
236 quantity compared to previously published models [3,4]. To test the performance of our EM, we  
237 evaluated its compliance to the assumptions of regression. The EM outperformed the old model, IM,  
238 when analyzing the MSE, normality of residuals and homoscedasticity, highlighting that an increased  
239 cell correction results in a more accurate gene expression estimation during aging.

240

241 Next, we asked which cell population contributed the most to the list of aging-related genes provided  
242 by both the IM and EM. For this purpose, we calculated per cell type the mean gene expression of both  
243 IM and EM genes using scRNA-seq data from ~25000 blood mononuclear cells of 45 donors [20]. The  
244 EM aging-related genes had lower mean gene expression levels, fewer cell type specific marker genes  
245 and those markers that were present were less abundantly expressed (Fig. S4). We consequently  
246 reasoned that these genes are less influenced by cell composition and quantity.

247

248 We performed a functional enrichment analysis for GO terms, Kegg and Reactome pathways in order  
249 to gain insight on the blood-based biological mechanisms driving aging. Although many of the EM  
250 genes were also identified using the IM, the enrichments were often not overlapping suggesting an

251 increased precision in evaluating the relation between gene expression and age. In particular, platelet-  
252 related categories stood out in these results. We clustered the EM genes based on gene expression  
253 residuals and again found the strongest enrichment in the upregulation of platelet activity.

254

255 Since our EM includes a correction for platelet counts, the observation that platelet activation is  
256 enriched in relation to the EM aging-related genes is possibly due to the following reasons: 1) the EM  
257 did not correct for cell counts sufficiently or 2) an increase in platelet activity is a true signature of  
258 aging. While we cannot exclude the first reason, the fact that platelets do not associate with age in our  
259 data make it less plausible. Moreover, platelet activity has been reported to increase with age in literature  
260 [22,23,25,26] and incubating human platelets with media from senescent human fibroblasts increases  
261 platelet activation and degranulation [24]. Upon degranulation, platelets release the factors present in  
262 their granules into the surrounding environment. Of note, our functional enrichment analysis retrieved  
263 GO terms related to alpha granules, which store PPBP and PF4. These proteins are known to be  
264 increasingly secreted during aging [22,27,28]. The genes encoding these proteins were found to be  
265 upregulated aging-related genes and, more specifically, they contributed to the enrichment of alpha-  
266 granule-related cell compartment GO terms (Tab. S8). Interestingly, an earlier study that performed  
267 RNA-seq within isolated platelets has observed decreased expression of *PF4* and *PPBP* with age ( $n =$   
268 154 [25]), while studies in whole blood show upregulation with age (current study: both genes  
269 significant; in the previous study [3]: *PF4* not tested, *PPBP* nominally significant). Within our scRNA-  
270 seq data, both genes are specifically expressed in megakaryocytes, the precursors of platelets (Fig. S6),  
271 suggesting that the observed upregulation is not driven by the expression in any other blood cell types,  
272 but by platelets or megakaryocytes themselves. Although these results may arise from differences in  
273 sample sizes or models used, this observation coupled with the fact that older individuals have higher  
274 levels of PF4 and PPBP protein in their plasma indicates that platelets become more active with age as  
275 reflected both in gene expression levels and protein abundance.

276

277 In addition, alpha granules are known to store aging-related proteins, such as IGF1, a protein that has  
278 been extensively connected to aging together with its orthologs in multiple organisms [29,30].

279 Therefore, an enhanced platelet degranulation itself could have a major impact on the progression of  
280 aging. In summary, we hypothesize that the platelet enrichment observed in the EM aging-related genes  
281 represents one of the molecular signatures of aging. The increased platelet activation and subsequent  
282 release of aging factors could affect other cells and in turn the whole organism. However, many details  
283 regarding the mechanisms that are affected by these aging factors remain to be discovered.

284

## 285 **Conclusions**

286 Overall, we have shown that an extensive correction for cell type differences can dramatically alter the  
287 effect sizes and significance of associations between genes and age. On top of this correction for  
288 measured or imputed cell counts, we believe that large scRNA-seq datasets (e.g. sc-eQTLGen  
289 consortium [31], The Human Cell Atlas [32]) will be essential to visualize and quantify to what extent  
290 associations are independent of cell type composition. Our and previous findings [25] indicate that it  
291 will be essential to investigate to what extent the increased platelet activity is driven by megakaryocytes  
292 using larger blood-based scRNA-seq datasets [33]. Lastly, while the current study was performed in  
293 blood, other tissues also feature cell type heterogeneity. As such, we conclude that rigorous correction  
294 for cell type counts is important for studies in whole blood, and will help to better understand immune  
295 aging and other gene expression association studies.

296

## 297 **Methods**

### 298 *Study populations*

299 We performed a meta-analysis using 3165 human peripheral blood samples obtained from four  
300 independent Dutch cohorts: LifeLines DEEP (LLD, n = 1100) [11], Leiden Longevity Study (LLS, n =  
301 585) [12], Netherlands Twin Registry (NTR, n = 852) [13] and Rotterdam Study (RS, n = 628) [14]  
302 with participants from a wide age range (Tab. S1). All cohorts followed similar protocols for genotyping  
303 and gene expression as part of the BIOS Consortium, an initiative of the Biobanking and Biomolecular  
304 Resources Research Infrastructure - The Netherlands [34].

305

### 306 *Gene expression*

307 Gene expression data was obtained using the same protocol across all studies, as previously described  
308 [35]. Briefly, RNA was extracted from whole blood using PAXgene Blood miRNA Kit (Qiagen,  
309 California, USA) and paired-end sequenced with the Illumina HiSeq 2000 platform. After quality  
310 control by FastQC, adapters were removed and read quality trimming steps executed. Reads were  
311 aligned with STAR using GRCh37 as a reference while masking common (MAF > 1%) SNPs in the  
312 Genome of the Netherlands (GoNL) [36]. Reads were assigned to genes with HTseq using gene  
313 definitions from Ensembl v71. Subsequently, expression values for all exons of each gene were added  
314 up to represent gene expression, measured in base count per gene. Prior to normalization, population  
315 outliers were removed based on a plot of the first two principal components (PCs), calculated on non-  
316 imputed genotypes. The first step in the normalization procedure was the application of the trimmed  
317 mean of M-values normalization method [37]. Next, we removed genes with no variance,  $\log_2$   
318 transformed the expression matrix and Z-transformed by centering and scaling of the genes, following  
319 a previously published protocol described in detail in the online cookbook [38].

320

### 321 *Cell count imputation*

322 We then performed imputation of cell counts, since these were not present for all included samples. For  
323 imputation, we only considered samples where all categorical covariates (sex, smoking status, fasting  
324 before blood sampling, RNA plate) were available (see Tab. S2 for missing values). We estimated the  
325 33 WBC subtypes included in the EM using the R package Decon-cell, a method that quantifies cell  
326 types using expression of marker genes (Tab. S3) [15]. The red blood cell (RBC) count was imputed  
327 using multivariate imputation by chained equations (MICE) from the R package MICE version 2.30  
328 [39] because this cannot be imputed based on gene expression values, but rather relies on the other cell  
329 type counts and other phenotypes (Tab. S2). In MICE, we used predictive mean matching, as it has the  
330 advantage of imputing missing values within the observed spectrum after creating a normal distribution  
331 [39,40]. Values outside the range of  $\pm 3$  standard deviations from the mean were removed after  $\log_2$   
332 transformation.

333

### 334 *Models for differential expression during chronological age*

335 The IM was taken from the previous work [3] and is:

336

$$337 \quad y_i \approx \beta_0 + \beta_1 age_i + \beta_2 x_{i2} + \dots + \beta_p x_{ip} + \varepsilon_i$$

338

339 with  $y$  being gene expression levels for every gene,  $i$  the number of cohort samples, age ( $x_{i1}$ ) in years at  
340 time of blood sampling, and the following additional variables being the other covariates, including cell  
341 counts (for a total of  $p$  predictors). To prevent overfitting, we required at least 10 samples for each  
342 available gene [41]. As covariates, we included sex, smoking status, fasting before blood sampling,  
343 RNA plate and GC content (an RNA-sequencing quality control score). All covariates were fixed  
344 effects, except for RNA plate, which was set as a random effect. As cell counts, we included the number  
345 of RBCs, platelets, granulocytes, lymphocytes and monocytes (Tab. S1). In our EM, the imputed  
346 proportions of 33 WBC subtypes were included as additional cell count measures, to increase the power  
347 to detect cell-independent age effects. For a complete overview of WBC subtypes see Tab. S3. Both the  
348 IM and EM were tested on 19932 genes that showed expression in blood of at least 0.5 counts per  
349 million in at least 1% of the samples [42]. For these tests, we used the lmer function from the R package  
350 lme4 version 1.1.13 [43]. Sample sizes, effect directions, and P-values were extracted from the result  
351 files of both linear models.

352

### 353 *Meta-analysis*

354 To combine associations across the four cohorts and to avoid bias of results due to cohort-specific  
355 effects, we first analyzed each cohort separately and then conducted a meta-analysis. We used the meta-  
356 analysis tool for genome-wide association scans (METAL) to calculate weighted Z-scores and P-values  
357 for every gene [44]. Although originally developed for meta-analysis of genome wide association  
358 studies (GWAS), METAL was easily adapted for expression associations as described in the previous  
359 work [3].

360

### 361 *Evaluation of the regression models*



362 To evaluate the performance of the regression models, we used gene expression residuals and  
363 investigated MSE values, distribution of residuals and homoscedasticity. The distribution of residuals  
364 was evaluated by calculating the QQ plot Pearson correlation coefficient from sample and theoretical  
365 quantiles, considering that the higher the correlation value, the more the distribution approximates  
366 normality. Regarding homoscedasticity, meta-analysis was conducted on cohort-related, gene-specific  
367 Spearman  $\rho$  values (rho values) obtained by correlating age with the gene expression residuals,  
368 calculated from the application of the IM and EM. For this purpose, a Fisher Z-transformation was  
369 applied to the  $\rho$  values after evaluating the approximation of their distribution to normality with a QQ  
370 plot. Then, Z-scores were combined across the cohorts using a weighted approach as described in [45]  
371 and the overall Z-score converted to  $\rho$  with the inverse Fisher transformation.

372

### 373 *Functional enrichment analysis*

374 To better understand gene function, we performed functional enrichment using Enrichr [21]. For this  
375 analysis, we grouped genes significantly associated with aging in either the IM or the EM into up- and  
376 downregulated genes. Using this approach, we retrieved information regarding enrichment in pathways  
377 based on KEGG and Reactome or GO terms.

378

### 379 *single-cell RNA-seq data and visualization*

380 To interpret the cell type specificity of our age-associated genes, we used scRNA-seq data for  
381 approximately ~25000 peripheral blood mononuclear cells from 45 LLD donors. Collection and  
382 normalization of the data has been described previously [20]. We used the R package Seurat version  
383 1.4.0.13 for scRNA-seq analyses and visualizations [46]. ScRNA-seq data enabled the detection of  
384 eleven cell types: classical and non-classical monocytes, myeloid and plasmacytoid dendritic cell, CD56  
385 bright and dim natural killer cells, CD4<sup>+</sup> and CD8<sup>+</sup> T-cells, B-cells, plasma cells and megakaryocytes  
386 [20]. Within these cell types, we calculated the mean expression of the genes significantly associated  
387 with aging identified by the IM and the EM, and represented their expression in t-SNE plots. We then  
388 identified genes that we considered markers for each of the 11 cell types using the function

389 `FindMarkers()` from Seurat using the loose thresholds of min.pct = 0.5, min.diff.pct = 0.2 to evaluate  
390 whether the aging-related genes were reflecting specific cell types.

391

## 392 **References**

393 1. López-Otín C, Blasco MA, Partridge L, Serrano M, Kroemer G. The hallmarks of aging. *Cell*.  
394 2013;153:1194.

395 2. Butler RN, Miller RA, Perry D, Carnes BA, Williams TF, Cassel C, et al. New model of health  
396 promotion and disease prevention for the 21st century. *BMJ*. 2008;337:149–50.

397 3. Peters MJ, Joehanes R, Pilling LC, Schurmann C, Conneely KN, Powell J, et al. The transcriptional  
398 landscape of age in human peripheral blood. *Nat Commun*. 2015;6.

399 4. Lin H, Lunetta KL, Zhao Q, Mandaviya PR, Rong J, Benjamin EJ, et al. Whole blood gene expression  
400 associated with clinical biological age. *Journals Gerontol Ser A*. 2019;74:81–8.

401 5. Palmer C, Diehn M, Alizadeh AA, Brown PO. Cell-type specific gene expression profiles of  
402 leukocytes in human peripheral blood. *BMC Genomics*. 2006;7:115.

403 6. Lin Y, Kim J, Metter EJ, Nguyen H, Truong T, Lustig A, et al. Changes in blood lymphocyte numbers  
404 with age in vivo and their association with the levels of cytokines/cytokine receptors. *Immun Ageing*.  
405 2016;13.

406 7. Shaw AC, Goldstein DR, Montgomery RR. Age-dependent dysregulation of innate immunity. *Nat*  
407 *Rev Immunol*. 2013;13:875–87.

408 8. Solana R, Pawelec G, Tarazona R. Aging and Innate Immunity. *Immunity*. 2006;24:491–4.

409 9. Aguirre-Gamboa R, Joosten I, Urbano PCM, van der Molen RG, van Rijssen E, van Cranenbroek B,  
410 et al. Differential Effects of Environmental and Genetic Factors on T and B Cell Immune Traits. *Cell*  
411 *Rep*. 2016;17:2474–87.

412 10. Melé M, Ferreira PG, Reverter F, DeLuca DS, Monlong J, Sammeth M, et al. The human  
413 transcriptome across tissues and individuals. *Science (80- )*. 2015;348:660–5.

414 11. Tigchelaar EF, Zhernakova A, Dekens JAM, Hermes G, Baranska A, Mujagic Z, et al. Cohort  
415 profile: LifeLines DEEP, a prospective, general population cohort study in the northern Netherlands:  
416 Study design and baseline characteristics. *BMJ Open*. 2015;5.

- 417 12. Schoenmaker M, de Craen AJM, de Meijer PHEM, Beekman M, Blauw GJ, Slagboom PE, et al.  
418 Evidence of genetic enrichment for exceptional survival using a family approach: The Leiden Longevity  
419 Study. *Eur J Hum Genet.* 2006;14:79–84.
- 420 13. Willemsen G, De Geus EJC, Bartels M, Van Beijsterveldt CEMT, Brooks AI, Estourgie-van Burk  
421 GF, et al. The Netherlands twin register biobank: A resource for genetic epidemiological studies. *Twin*  
422 *Res Hum Genet.* 2010;13:231–45.
- 423 14. Ikram MA, Brusselle G, Ghanbari M, Goedegebure A, Ikram MK, Kavousi M, et al. Objectives,  
424 design and main findings until 2020 from the Rotterdam Study. *Eur J Epidemiol.* 2020;35:483–517.
- 425 15. Aguirre-Gamboa R, de Klein N, di Tommaso J, Claringbould A, Vösa U, Zorro M, et al.  
426 Deconvolution of bulk blood eQTL effects into immune cell subpopulations. *bioRxiv.* 2019;548669.
- 427 16. Quinn KM, Fox A, Harland KL, Russ BE, Li J, Nguyen THO, et al. Age-Related Decline in Primary  
428 CD8+ T Cell Responses Is Associated with the Development of Senescence in Virtual Memory CD8+  
429 T Cells. *Cell Rep.* 2018;23:3512–24.
- 430 17. Van Rooij J, Mandaviya PR, Claringbould A, Felix JF, Van Dongen J, Jansen R, et al. Evaluation  
431 of commonly used analysis strategies for epigenome- And transcriptome-wide association studies  
432 through replication of large-scale population studies. *Genome Biol.* 2019;20.
- 433 18. Carroll RJ, Ruppert D. Transformation and weighting in regression. CRC Press. 1988;30.
- 434 19. Loguinov A V., Mian IS, Vulpe CD. Exploratory differential gene expression analysis in microarray  
435 experiments with no or limited replication. *Genome Biol.* 2004;5:R18.
- 436 20. Van Der Wijst MGP, Brugge H, De Vries DH, Deelen P, Swertz MA, Franke L. Single-cell RNA  
437 sequencing identifies celltype-specific cis-eQTLs and co-expression QTLs. *Nat Genet.* 2018;50:493–7.
- 438 21. Kuleshov M V, Jones MR, Rouillard AD, Fernandez NF, Duan Q, Wang Z, et al. Enrichr: a  
439 comprehensive gene set enrichment analysis web server 2016 update. *Nucleic Acids Res.*  
440 2016;44:W90–7.
- 441 22. Le Blanc J, Lordkipanidzé M. Platelet Function in Aging. *Front Cardiovasc Med.* 2019;6.
- 442 23. Campbell RA, Franks Z, Bhatnagar A, Rowley JW, Manne BK, Supiano MA, et al. Granzyme A in  
443 Human Platelets Regulates the Synthesis of Proinflammatory Cytokines by Monocytes in Aging. *J*  
444 *Immunol.* 2018;200:295–304.

- 445 24. Wiley CD, Liu S, Limbad C, Zawadzka AM, Beck J, Demaria M, et al. SILAC Analysis Reveals  
446 Increased Secretion of Hemostasis-Related Factors by Senescent Cells. *Cell Rep.* 2019;28:3329-  
447 3337.e5.
- 448 25. Simon LM, Edelstein LC, Nagalla S, Woodley AB, Chen ES, Kong X, et al. Human platelet  
449 microRNA-mRNA networks associated with age and gender revealed by integrated plateletomics.  
450 *Blood.* 2014;123:e37–45.
- 451 26. Davizon-Castillo P, McMahon B, Aguila S, Bark D, Ashworth K, Allawzi A, et al. TNF- $\alpha$ -driven  
452 inflammation and mitochondrial dysfunction define the platelet hyperreactivity of aging. *Blood.*  
453 2019;134:727–40.
- 454 27. Bastyr EJ, Kadrofske MM, Vinik AI. Platelet activity and phosphoinositide turnover increase with  
455 advancing age. *Am J Med.* 1990;88:601–6.
- 456 28. Zahavi J, Jones NAG, Leyton J, Dubiel M, Kakkar V V. Enhanced in vivo platelet “release reaction”  
457 in old healthy individuals. *Thromb Res.* 1980;17:329–36.
- 458 29. Vitale G, Pellegrino G, Vollery M, Hofland LJ. ROLE of IGF-1 system in the modulation of  
459 longevity: Controversies and new insights from a centenarians’ perspective. *Front Endocrinol*  
460 *(Lausanne).* 2019;10.
- 461 30. Fontana L, Partridge L, Longo VD. Extending healthy life span-from yeast to humans. *Science* (80-  
462 ). 2010;328:321–6.
- 463 31. Van Der Wijst MGP, de Vries DH, Groot HE, Trynka G, Hon CC, Bonder MJ, et al. The single-cell  
464 eQTLGen consortium. *Elife.* 2020;9.
- 465 32. Regev A, Teichmann SA, Lander ES, Amit I, Benoist C, Birney E, et al. Science forum: the human  
466 cell atlas. *Elife.* 2017;6:e27041.
- 467 33. Davizon-Castillo P, Rowley JW, Rondina MT. Megakaryocyte and Platelet Transcriptomics for  
468 Discoveries in Human Health and Disease. *Arterioscler Thromb Vasc Biol.* 2020;ATVBAHA-119.
- 469 34. Brandsma M, Baas F, Bakker P, Beem E, Boomsma D, Bovenberg J, et al. How to kickstart a  
470 national biobanking infrastructure – experiences and prospects of BBMRI-NL. *Nor Epidemiol.*  
471 2012;21.
- 472 35. Zhernakova D V., Deelen P, Vermaat M, Van Iterson M, Van Galen M, Arindrarto W, et al.

- 473 Identification of context-dependent expression quantitative trait loci in whole blood. *Nat Genet.*  
474 2017;49:139–45.
- 475 36. Francioli LC, Menelaou A, Pulit SL, Van Dijk F, Palamara PF, Elbers CC, et al. Whole-genome  
476 sequence variation, population structure and demographic history of the Dutch population. *Nat Genet.*  
477 2014;46:818–25.
- 478 37. Robinson MD, Oshlack A. A scaling normalization method for differential expression analysis of  
479 RNA-seq data. *Genome Biol.* 2010;11:R25.
- 480 38. eQTL mapping analysis cookbook for RNA seq data - molgenis/systemsgenetics Wiki - GitHub.  
481 [https://github.com/molgenis/systemsgenetics/wiki/eQTL-mapping-analysis-cookbook-for-RNA-seq-](https://github.com/molgenis/systemsgenetics/wiki/eQTL-mapping-analysis-cookbook-for-RNA-seq-data)  
482 [data.](https://github.com/molgenis/systemsgenetics/wiki/eQTL-mapping-analysis-cookbook-for-RNA-seq-data)
- 483 39. van Buuren S, Groothuis-Oudshoorn K. mice: Multivariate imputation by chained equations in R. *J*  
484 *Stat Softw.* 2011;45:1–67.
- 485 40. Little RJA. Missing-data adjustments in large surveys. *J Bus Econ Stat.* 1988;6:287–96.
- 486 41. Babyak MA. What you see may not be what you get: A brief, nontechnical introduction to overfitting  
487 in regression-type models. *Psychosom Med.* 2004;66:411–21.
- 488 42. Vösa U, Claringbould A, Westra H-J, Bonder MJ, Deelen P, Zeng B, et al. Unraveling the polygenic  
489 architecture of complex traits using blood eQTL metaanalysis. *bioRxiv.* 2018;447367.
- 490 43. Bates D, Mächler M, Bolker BM, Walker SC. Fitting linear mixed-effects models using lme4. *J Stat*  
491 *Softw.* 2015;67:1–48.
- 492 44. Willer CJ, Li Y, Abecasis GR. METAL: fast and efficient meta-analysis of genomewide association  
493 scans. *Bioinformatics.* 2010;26:2190–1.
- 494 45. Stouffer SA, Suchman EA, DeVinney LC, Star SA, Williams Jr RM. Adjustment during Army Life.  
495 1949;1.
- 496 46. Satija R, Farrell JA, Gennert D, Schier AF, Regev A. Spatial reconstruction of single-cell gene  
497 expression data. *Nat Biotechnol.* 2015;33:495–502.

498

#### 499 **Declarations**

500 *Ethics approval and consent to participate*

501 Written informed consent was obtained previously for each of the biobanks separately in accordance  
502 with the ethical and institutional regulations [11–14].

503

504 *Consent for publication*

505 Not applicable.

506

507 *Availability of data and materials*

508 The data that support the findings of this study are available from BBMRI-NL but restrictions apply to  
509 the availability of these data, which were used under license for the current study, and so are not publicly  
510 available. Data are available upon reasonable request and with permission of BBMRI-NL. Summary  
511 statistics on the whole-blood gene expression, cell count imputation and expression-age associations  
512 are available from the BBMRI-NL atlas (<http://bbmri.researchlumc.nl/atlas/>). Raw RNA-seq data can  
513 be obtained from the European Genome-phenome Archive (EGA; accession EGAS00001001077).  
514 Individual-level genotypes are not publicly available to ensure participant privacy, but access can be  
515 requested from the BIOS consortium (<https://www.bbmri.nl/acquisition-use-analyze/bios>).

516 For the scRNA-seq data, please refer to [20].

517

518 *Competing interests*

519 The authors declare no conflict of interest.

520

521 *Funding*

522 This work is supported by a grant from the European Research Council (ERC, ERC Starting Grant  
523 agreement number 637640 ImmRisk) to LF and a VIDI grant (917.14.374) from the Netherlands  
524 Organization for Scientific Research (NWO) to LF.

525

526 *Authors contribution*

527 DPC and AC contributed equally to this work.

528

529 *Acknowledgements*

530 We thank the UMCG Genomics Coordination Center, MOLGENIS team, the UG Center for  
531 Information Technology, the UMCG research IT program and their sponsors in particular BBMRI-NL  
532 for data storage, high performance compute and web hosting infrastructure. BBMRI-NL is a research  
533 infrastructure financed by the Netherlands Organization for Scientific Research (NWO) [grant number  
534 184.033.111].
